# Supplementary material
Source: HighWire-hosted journal article supplement (https://jnm.snmjournals.org/highwire/filestream/95578/field_highwire_adjunct_files/0/227801_Supplemental_Data.pdf)
Supplement: 227801_Supplemental_Data.pdf [file 227801_Supplemental_Data.pdf]

SUPPLEMENTAL

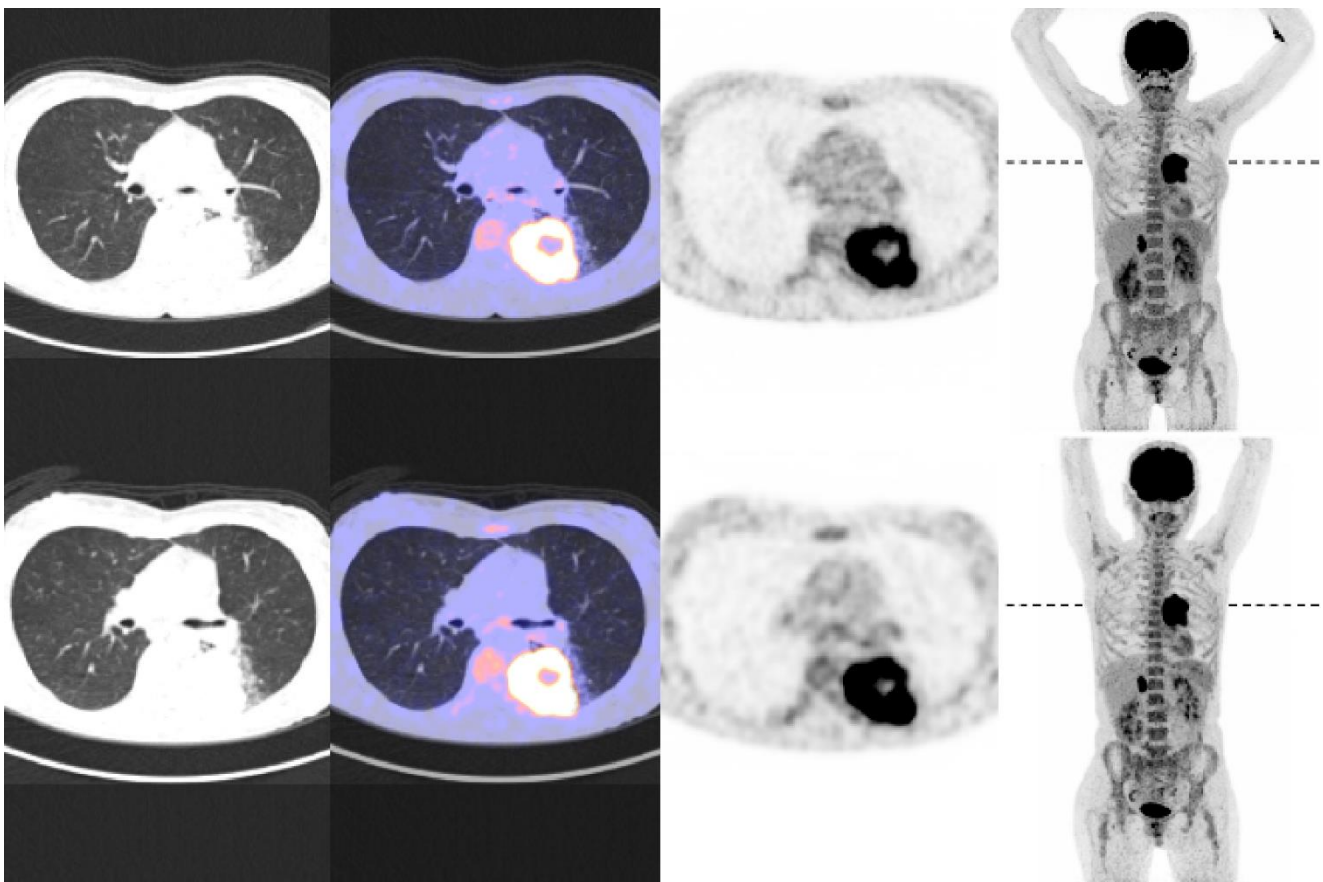

Supplemental Figure 1 - Illustrative transaxial CT, fusion PET/CT, and maximum intensity projection PET images (from left to right) acquired on the Biograph Vision (upper row) and acquired on the Biograph mCT (lower row) of a 47-year old female patient (weight 53 kg) with metastasized Non-Small Cell Lung Carcinoma. The position of the transaxial slice is indicated on the MIP (dashed line).

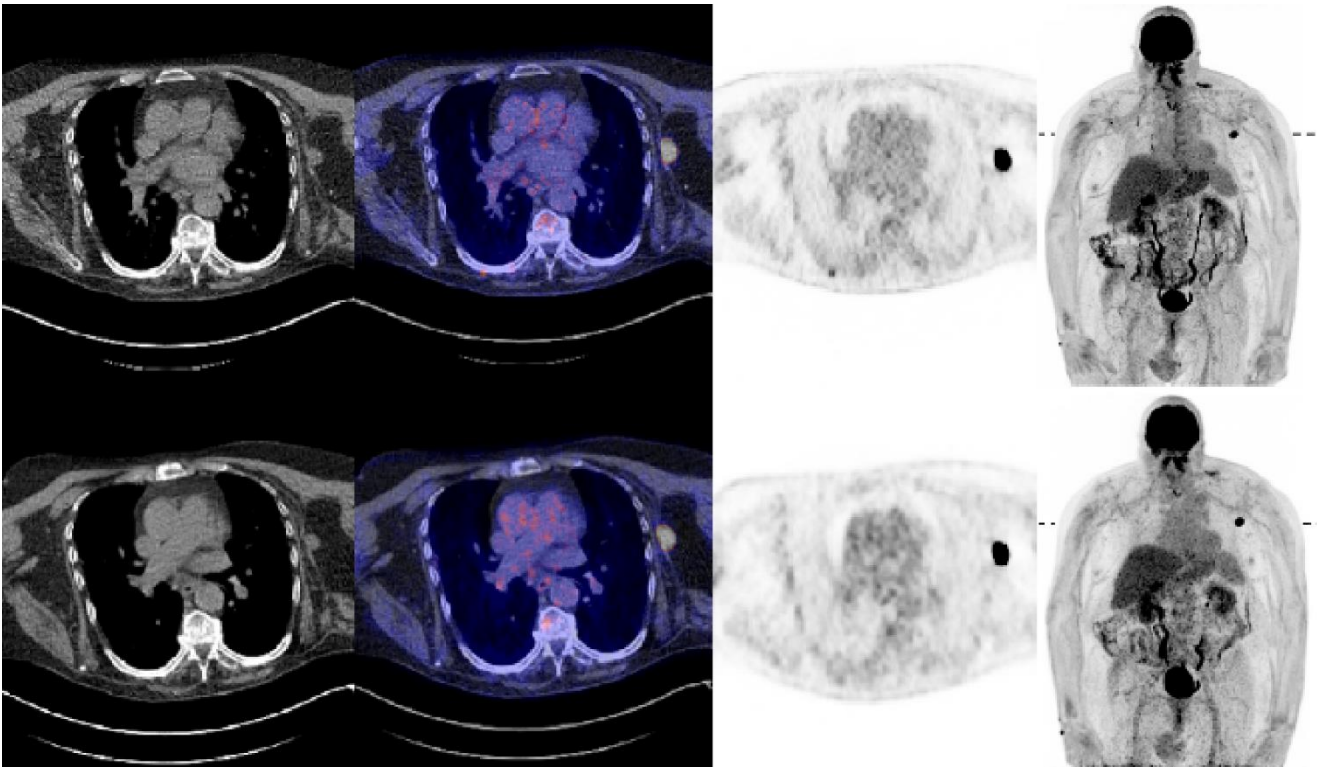

Supplemental Figure 2 – Illustrative transaxial CT, fusion PET/CT, and maximum intensity projection PET images (from left to right) acquired on the Biograph Vision (upper row) and acquired on the Biograph mCT (lower row) of a 74- year old male patient (weight 139 kg) with metastasized melanoma. The position of the transaxial slice is indicated on the MIP (dashed line).

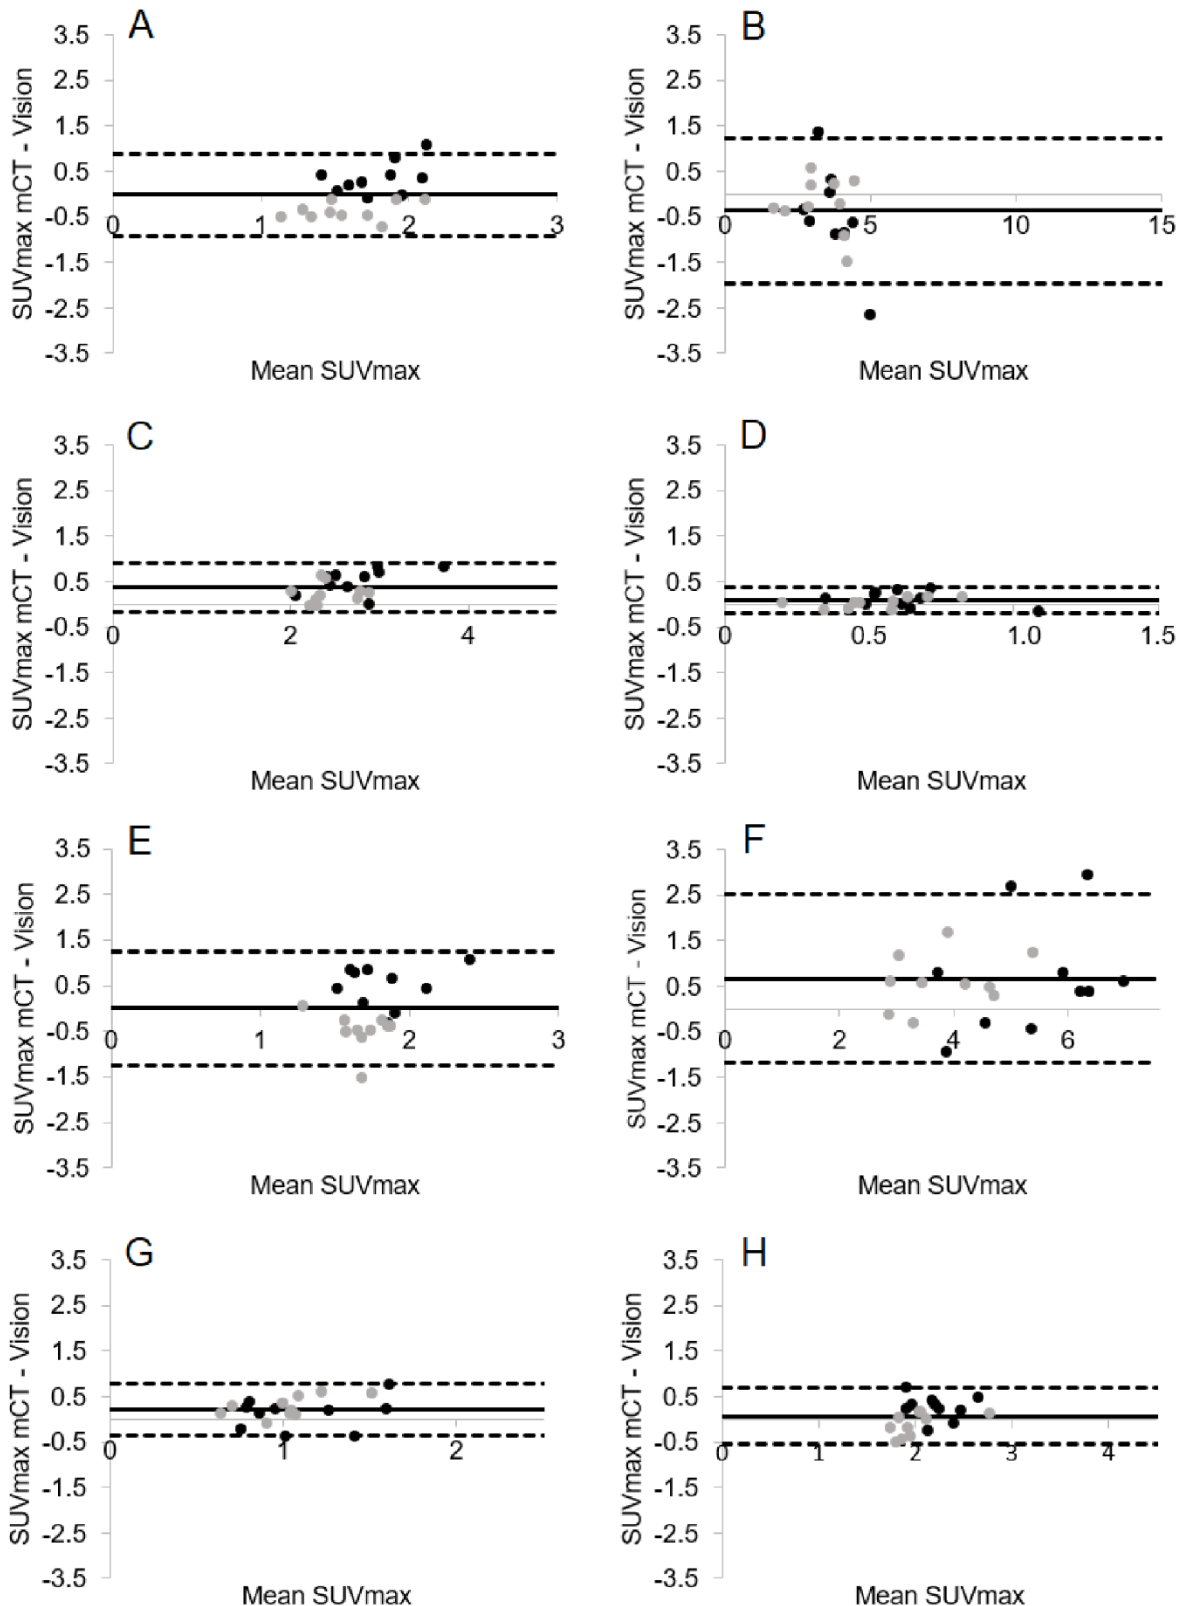

Supplemental Figure 3 - Bland-Altman plots of Biograph mCT and Biograph Vision SUVmax measurement differences (SUVmax measured on the mCT minus SUVmax measured on the Vision) plotted against the mean SUVmax (the mean SUVmax between systems). The mean difference between SUVmax measurement differences is illustrated by the horizontal solid black line and the upper and lower limits of agreement are shown by the dashed horizontal lines. The measurements performed on the Biograph mCT first and the Biograph Vision first are illustrated with the black and grey dots, respectively. The individual plots represent the different healthy tissues of the measurement: aortic arch (A), semioval center (B), liver (C), lung (D), left ventricle (E), parotid gland (F), quadriceps muscle (G), and spleen (H). At least 96% of the difference scores fell within the 95% limits of agreement.

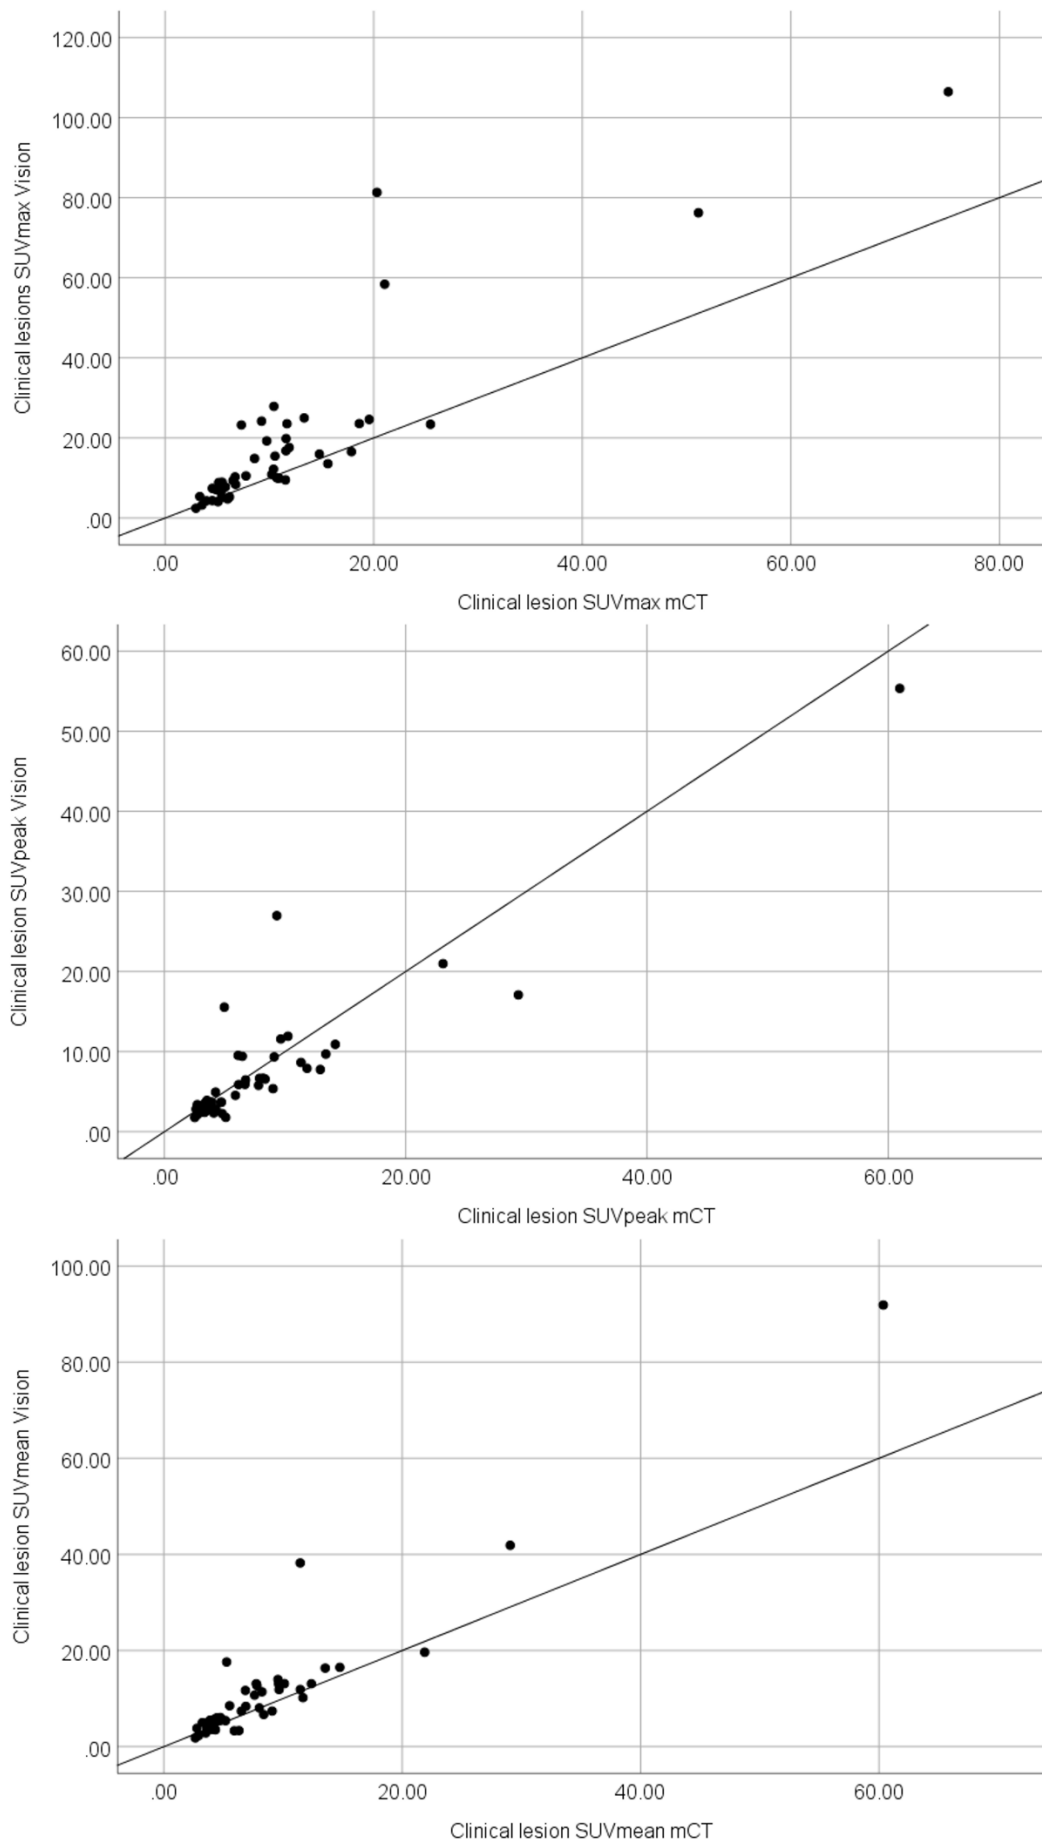

Supplemental Figure 4 – Scatter plots demonstrating a higher lesion SUVmax (part A) obtained from the Biograph Vision images with respect to the Biograph mCT images. Similar lesion SUVpeak (part B) and SUVmean (part C) are observed between systems.
